# Supplementary material
Source: Royal Society of Chemistry journal article supplement (doi:10.1039/d5cp04646g)
Supplement: d5cp04646g1.pdf [file d5cp04646g1.pdf]

# Supporting Information

## Rationalization of Experimental Photoelectron Spectra of Cyanocyclopentadienide Anion ( $\text{CpCN}^-$ ) via Vibronic Coupling Theory

Shyam Sharan Tripathi, Sakshi Yadav, Poulami Pal and

Tammineni Rajagopala Rao†

*Department of Chemistry, Indian Institute of Technology Patna, Bihta, Bihar, India 801106\**

---

\* rajgopal@iitp.ac.in

Table S1. **Harmonic vibrational frequencies associated with asymmetric modes [in  $\text{cm}^{-1}$ ] of  $\text{CpCN}^-$ .**

| Vibrational Mode(Asymmetry) | Anion Frequency( $\omega_i$ ) |
|-----------------------------|-------------------------------|
| <b><math>a_2</math></b>     |                               |
| $\nu_{11}$ ( $a_2$ )        | 627.1699                      |
| $\nu_{12}$ ( $a_2$ )        | 692.0269                      |
| $\nu_{13}$ ( $a_2$ )        | 867.1485                      |
| <b><math>b_1</math></b>     |                               |
| $\nu_{14}$ ( $b_1$ )        | 163.0324                      |
| $\nu_{15}$ ( $b_1$ )        | 549.3511                      |
| $\nu_{16}$ ( $b_1$ )        | 652.9423                      |
| $\nu_{17}$ ( $b_1$ )        | 714.5966                      |
| $\nu_{18}$ ( $b_1$ )        | 829.3983                      |
| <b><math>b_2</math></b>     |                               |
| $\nu_{19}$ ( $b_2$ )        | 178.9352                      |
| $\nu_{20}$ ( $b_2$ )        | 594.9532                      |
| $\nu_{21}$ ( $b_2$ )        | 862.2656                      |
| $\nu_{22}$ ( $b_2$ )        | 1059.4758                     |
| $\nu_{23}$ ( $b_2$ )        | 1236.0649                     |
| $\nu_{24}$ ( $b_2$ )        | 1380.6294                     |
| $\nu_{25}$ ( $b_2$ )        | 1488.8446                     |
| $\nu_{26}$ ( $b_2$ )        | 3197.6679                     |
| $\nu_{27}$ ( $b_2$ )        | 3232.3531                     |

Table S2. **higher order coupling terms for symmetric states**

| Mode       | $C$         | $D$      | $C$         | $D$     |
|------------|-------------|----------|-------------|---------|
|            | $\tilde{B}$ |          | $\tilde{C}$ |         |
| $\nu_1$    |             |          |             |         |
| $\nu_2$    | 0.00081     | -0.00001 |             |         |
| $\nu_3$    | -0.0010     |          |             |         |
| $\nu_4$    |             |          |             |         |
| $\nu_5$    | 0.0031      |          |             |         |
| $\nu_6$    |             |          | -0.00040    |         |
| $\nu_7$    |             |          |             |         |
| $\nu_8$    |             |          | -0.00089    | 0.00041 |
| $\nu_9$    |             |          |             |         |
| $\nu_{10}$ | -0.00021    |          |             |         |

Table S3. **Hamiltonian parameters of CpCN<sup>-</sup> for asymmetric modes.**

| Mode            | $\gamma$    | $D$      | $\gamma$    | $D$      |
|-----------------|-------------|----------|-------------|----------|
|                 | $\tilde{X}$ |          | $\tilde{A}$ |          |
| $\nu_{11}(a_2)$ | -0.01804    |          | -0.01571    |          |
| $\nu_{12}(a_2)$ | 0.13705     |          | 0.03734     |          |
| $\nu_{13}(a_2)$ | 0.01880     |          | 0.17994     |          |
| $\nu_{14}(b_1)$ | 0.01650     |          | -0.00897    |          |
| $\nu_{15}(b_1)$ | -0.01659    |          | -0.00821    |          |
| $\nu_{16}(b_1)$ | 0.00313     |          | -0.01667    |          |
| $\nu_{17}(b_1)$ | 0.01796     |          | 0.00793     |          |
| $\nu_{18}(b_1)$ | 0.02434     |          | 0.01269     |          |
| $\nu_{19}(b_2)$ | 0.00297     |          | 0.00561     |          |
| $\nu_{20}(b_2)$ | -0.00651    |          | 0.00235     |          |
| $\nu_{21}(b_2)$ | -0.04142    | 0.00032  | 0.04188     | -0.00031 |
| $\nu_{22}(b_2)$ | -0.01993    | 0.00017  | 0.03355     | -0.00018 |
| $\nu_{23}(b_2)$ | -0.16114    | 0.00014  | 0.03096     | -0.00015 |
| $\nu_{24}(b_2)$ | -0.09341    | 0.00088  | 0.11106     | -0.00091 |
| $\nu_{25}(b_2)$ | -0.04452    | 0.00037  | 0.04991     | -0.00037 |
| $\nu_{26}(b_2)$ | 0.00755     |          | 0.00825     |          |
| $\nu_{27}(b_2)$ | 0.00509     |          | 0.00636     |          |
|                 | $\tilde{B}$ |          | $\tilde{C}$ |          |
| $\nu_{11}(a_2)$ | -0.02247    | 0.00015  | 0.01457     | -0.00032 |
| $\nu_{12}(a_2)$ | -0.06185    |          | 0.00393     |          |
| $\nu_{13}(a_2)$ | -0.06670    | 0.00048  | 0.06647     | -0.00085 |
| $\nu_{14}(b_1)$ | -0.01576    |          | -0.02469    |          |
| $\nu_{15}(b_1)$ | -0.01481    |          | -0.01865    |          |
| $\nu_{16}(b_1)$ | -0.00961    |          | -0.01285    |          |
| $\nu_{17}(b_1)$ | 0.00577     | -0.00016 | -0.02370    |          |
| $\nu_{18}(b_1)$ | 0.00402     | -0.00007 | -0.04142    |          |
| $\nu_{19}(b_2)$ | -0.04102    |          | -0.02587    |          |
| $\nu_{20}(b_2)$ | -0.02490    |          | -0.01001    |          |
| $\nu_{21}(b_2)$ | 0.00726     | -0.00078 | 0.00317     |          |
| $\nu_{22}(b_2)$ | -0.00156    | -0.00005 | 0.01013     |          |
| $\nu_{23}(b_2)$ | -0.01635    |          | 0.00711     |          |
| $\nu_{24}(b_2)$ | -0.07642    |          | 0.00581     | 0.00038  |
| $\nu_{25}(b_2)$ | -0.08195    |          | 0.01932     |          |
| $\nu_{26}(b_2)$ | -0.00105    | -0.00010 | 0.00770     |          |
| $\nu_{27}(b_2)$ | 0.000059    | -0.00004 | 0.00547     |          |

Table S4. **Combination of Normal Modes, Size of the Primitive Basis, and the Single-Particle Function (SPF) for Uncoupled TD and TI Calculations of CpCN<sup>-</sup> utilizing the MCTDH Method.**

| Combination of normal modes | Primitive basis | SPF           |
|-----------------------------|-----------------|---------------|
| $\nu_6$                     | 18              | [14,14,14,14] |
| $\nu_4$                     | 17              | [12,12,12,12] |
| $\nu_1, \nu_2, \nu_3$       | 16, 16, 16      | [10,10,10,10] |
| $\nu_5, \nu_7$              | 15, 15          | [8,8,8,8]     |
| $\nu_8$                     | 14              | [4,4,4,4]     |
| $\nu_1, \nu_6$              | 10,10           |               |
| $\nu_1, \nu_2, \nu_3$       | 8, 8, 8         |               |
| $\nu_5, \nu_7$              | 5, 5            |               |
| $\nu_8$                     | 3               |               |

Table S5. **Combination of Normal Modes, Size of the Primitive Basis, and the SPF for Coupled TD Calculations of CpCN<sup>-</sup> utilizing the MCTDH Method.**

| Electronic states               | Normal modes                                                                            | Primitive basis              | SPF basis |
|---------------------------------|-----------------------------------------------------------------------------------------|------------------------------|-----------|
|                                 | $\nu_{12}, \nu_{13}, \nu_{14}, \nu_{19}$                                                | (14,14,14,14)                | [6,6,6,6] |
| Coupled $\tilde{X} - \tilde{C}$ | $\nu_6, \nu_{15}, \nu_{16}, \nu_{17}, \nu_{18}, \nu_{20}, \nu_{21}, \nu_{22}, \nu_{24}$ | (12,12,12,12,12,12,12,12,12) | [4,4,4,4] |
| electronic states               | $\nu_1, \nu_2, \nu_3, \nu_4, \nu_{11}, \nu_{25}$                                        | (10,10,10,10,10,10)          | [2,2,2,2] |
|                                 | $\nu_5, \nu_7$                                                                          | (8,8)                        | [2,2,2,2] |

Table S6. **Vibronic level assignments in symmetric modes (in  $\text{cm}^{-1}$ ) for  $\tilde{X}$  and  $\tilde{A}$  states.**

| $\tilde{X}$ State           |                           | $\tilde{A}$ State           |                           |
|-----------------------------|---------------------------|-----------------------------|---------------------------|
| Vibronic Energy Assignments |                           | Vibronic Energy Assignments |                           |
| 0                           | $0_0^0$                   | 0                           | $0_0^0$                   |
| 551                         | $\nu_{10}^1$              | 569                         | $\nu_{10}^1$              |
| 1081                        | $\nu_{20}^1$              | 1069                        | $\nu_{20}^1$              |
| 1102                        | $\nu_{30}^1$              | 1093                        | $\nu_{30}^1$              |
| 1108                        | $\nu_{10}^2$              | 1138                        | $\nu_{10}^2$              |
| 1481                        | $\nu_{60}^1$              | 1507                        | $\nu_{60}^1$              |
| 1514                        | $\nu_{70}^1$              | 1539                        | $\nu_{70}^1$              |
| 1632                        | $\nu_{10}^1 + \nu_{20}^1$ | 1638                        | $\nu_{10}^1 + \nu_{20}^1$ |
| 1654                        | $\nu_{10}^1 + \nu_{30}^1$ | 1662                        | $\nu_{10}^1 + \nu_{30}^1$ |
| 1926                        | $\nu_{50}^1$              | 1904                        | $\nu_{50}^1$              |
| 2019                        | $\nu_{40}^1$              | 2007                        | $\nu_{40}^1$              |
| 2032                        | $\nu_{10}^3$              | 2031                        | $\nu_{10}^3$              |
| 2044                        | $\nu_{10}^1 + \nu_{60}^1$ | 2076                        | $\nu_{10}^1 + \nu_{60}^1$ |
| 2065                        | $\nu_{10}^1 + \nu_{70}^1$ | 2108                        | $\nu_{10}^1 + \nu_{70}^1$ |
| 2162                        | $\nu_{20}^1 + \nu_{40}^1$ | 2137                        | $\nu_{20}^2$              |
| 2184                        | $\nu_{20}^1 + \nu_{30}^1$ | 2162                        | $\nu_{20}^1 + \nu_{30}^1$ |
| 2189                        | $\nu_{10}^2 + \nu_{20}^1$ | 2186                        | $\nu_{30}^2$              |
| 2209                        | $\nu_{30}^2$              | 2207                        | $\nu_{10}^2 + \nu_{20}^1$ |
| 2477                        | $\nu_{10}^1 + \nu_{50}^1$ | 2476                        | $\nu_{10}^1 + \nu_{50}^1$ |
| 2562                        | $\nu_{20}^1 + \nu_{60}^1$ | 2576                        | $\nu_{20}^1 + \nu_{60}^1$ |

Table S7. Vibronic level assignments in symmetric modes (in  $\text{cm}^{-1}$ ) for  $\tilde{B}$  and  $\tilde{C}$  states.

| $\tilde{B}$ State           |                           | $\tilde{C}$ State           |                           |
|-----------------------------|---------------------------|-----------------------------|---------------------------|
| Vibronic Energy Assignments |                           | Vibronic Energy Assignments |                           |
| 0                           | $0_0^0$                   | 0                           | $0_0^0$                   |
| 501                         | $\nu_{10}^1$              | 545                         | $\nu_{10}^1$              |
| 902                         | $\nu_{20}^1$              | 964                         | $\nu_{20}^1$              |
| 994                         | $\nu_{30}^1$              | 1082                        | $\nu_{30}^1$              |
| 1005                        | $\nu_{10}^2$              | 1091                        | $\nu_{10}^2$              |
| 1046                        | $\nu_{40}^1$              | 1108                        | $\nu_{40}^1$              |
| 1123                        | $\nu_{60}^1$              | 1281                        | $\nu_{50}^1$              |
| 1264                        | $\nu_{50}^1$              | 1423                        | $\nu_{60}^1$              |
| 1404                        | $\nu_{10}^1 + \nu_{20}^1$ | 1510                        | $\nu_{10}^1 + \nu_{20}^1$ |
| 1496                        | $\nu_{10}^1 + \nu_{30}^1$ | 1579                        | $\nu_{70}^1$              |
| 1523                        | $\nu_{10}^3$              | 1628                        | $\nu_{10}^1 + \nu_{30}^1$ |
| 1548                        | $\nu_{10}^2 + \nu_{40}^1$ | 1638                        | $\nu_{10}^3$              |
| 1766                        | $\nu_{10}^1 + \nu_{50}^1$ | 1654                        | $\nu_{10}^1 + \nu_{40}^1$ |
| 1800                        | $\nu_{20}^2$              | 1827                        | $\nu_{10}^1 + \nu_{50}^1$ |
| 1897                        | $\nu_{20}^1 + \nu_{30}^1$ | 1929                        | $\nu_{20}^2$              |
| 1908                        | $\nu_{10}^2 + \nu_{20}^1$ | 1969                        | $\nu_{10}^1 + \nu_{60}^1$ |
| 1948                        | $\nu_{20}^1 + \nu_{40}^1$ | 2047                        | $\nu_{20}^1 + \nu_{30}^1$ |
| 1989                        | $\nu_{10}^3$              | 2056                        | $\nu_{10}^2 + \nu_{20}^1$ |
| 2000                        | $\nu_{10}^4$              | 2072                        | $\nu_{20}^2 + \nu_{40}^1$ |
|                             |                           | 2125                        | $\nu_{10}^1 + \nu_{70}^1$ |

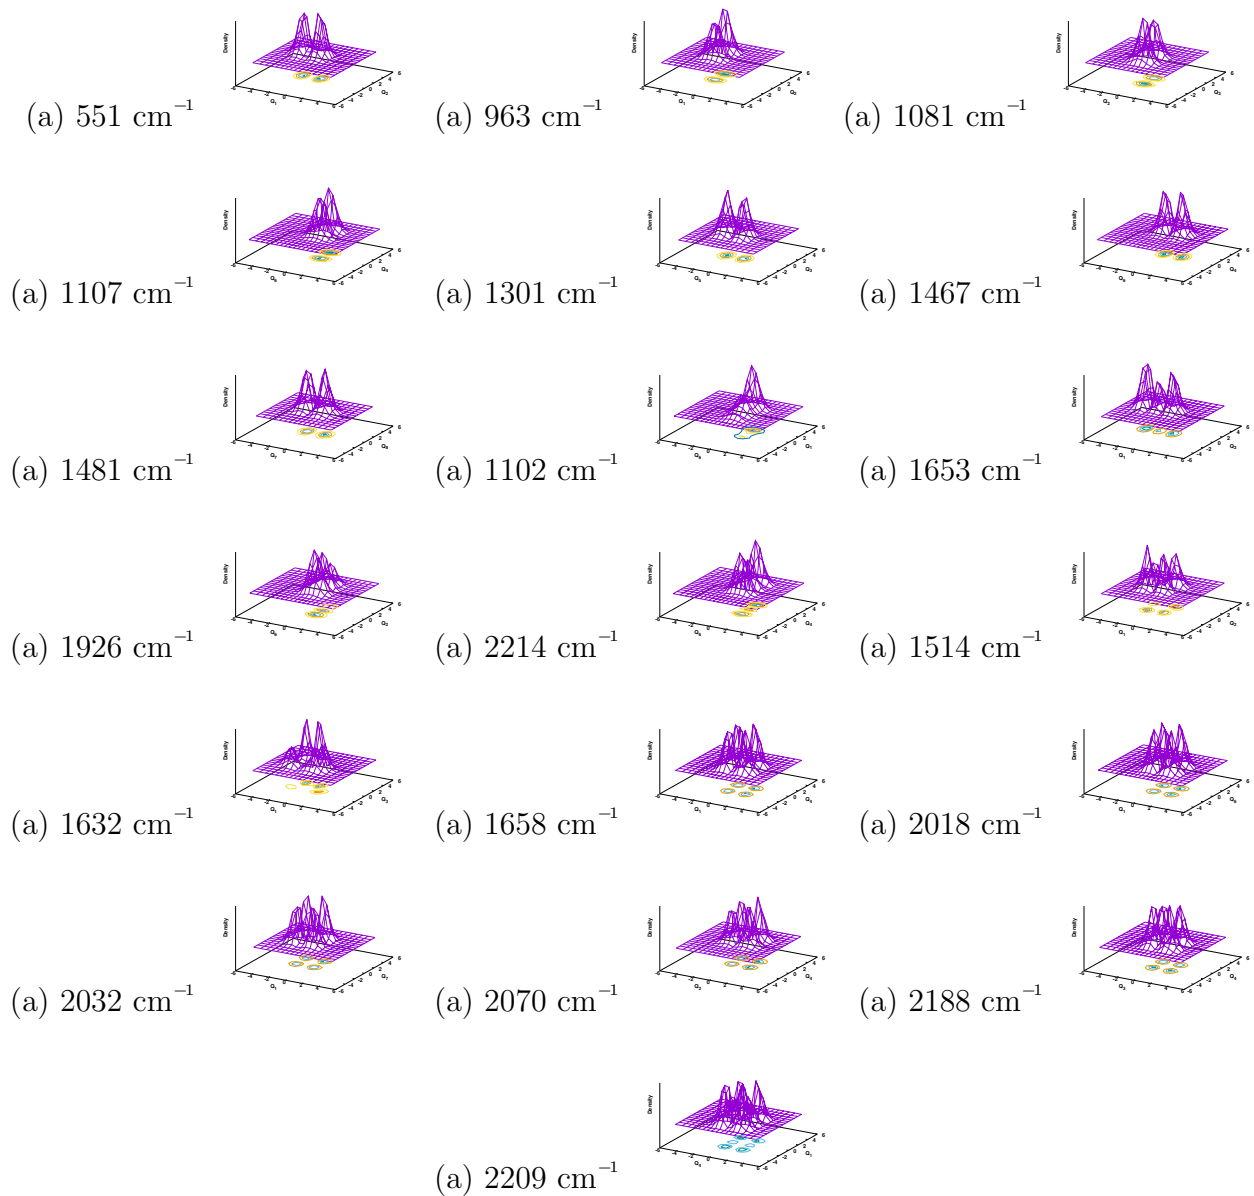

Figure S1. Wavepacket density plots for the  $\tilde{X}$  state including only totally symmetric vibrational modes. The snapshots illustrate Franck–Condon fundamentals, overtones, and combination bands in the absence of interstate vibronic coupling; the coupling parameter  $\lambda$  is therefore inactive in these calculations.

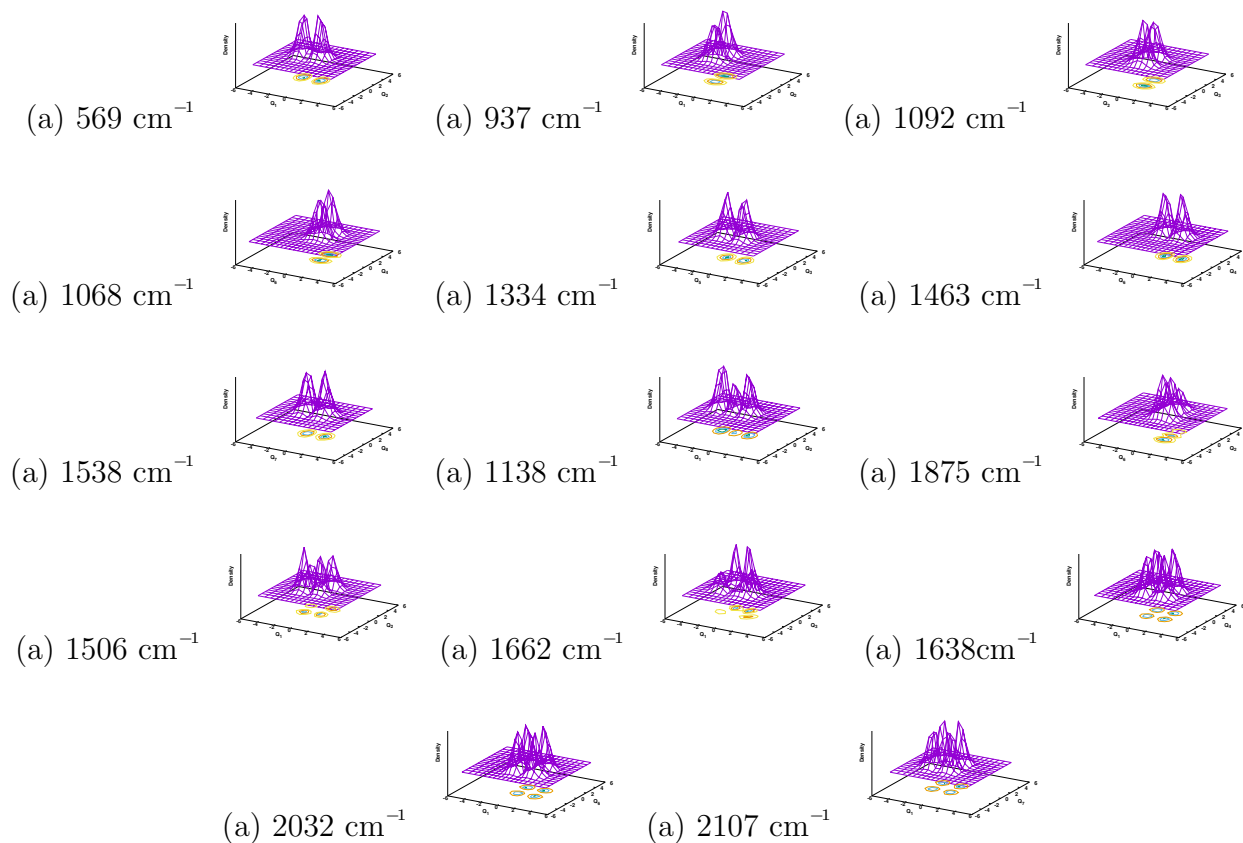

Figure S2. Wavepacket density plots for the  $\tilde{A}$  state including only totally symmetric vibrational modes. The snapshots illustrate Franck–Condon fundamentals, overtones, and combination bands in the absence of interstate vibronic coupling; the coupling parameter  $\lambda$  is therefore inactive in these calculations.

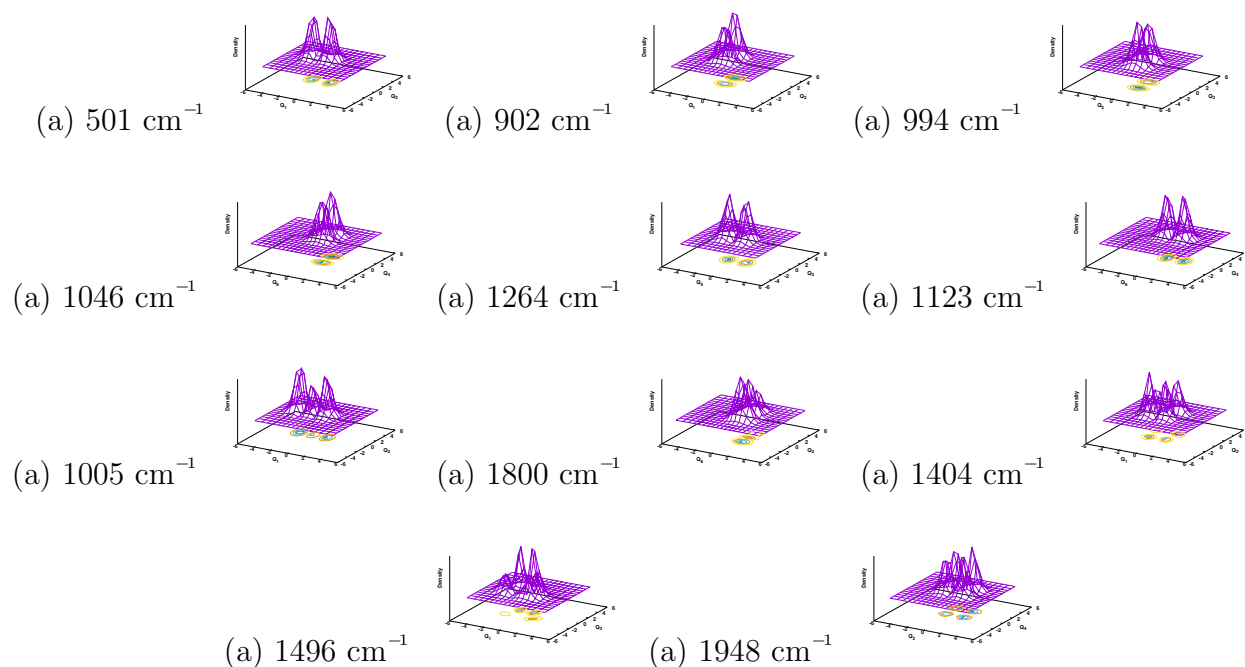

Figure S3. Wavepacket density plots for the  $\tilde{B}$  state including only totally symmetric vibrational modes. The snapshots illustrate Franck–Condon fundamentals, overtones, and combination bands in the absence of interstate vibronic coupling; the coupling parameter  $\lambda$  is therefore inactive in these calculations.

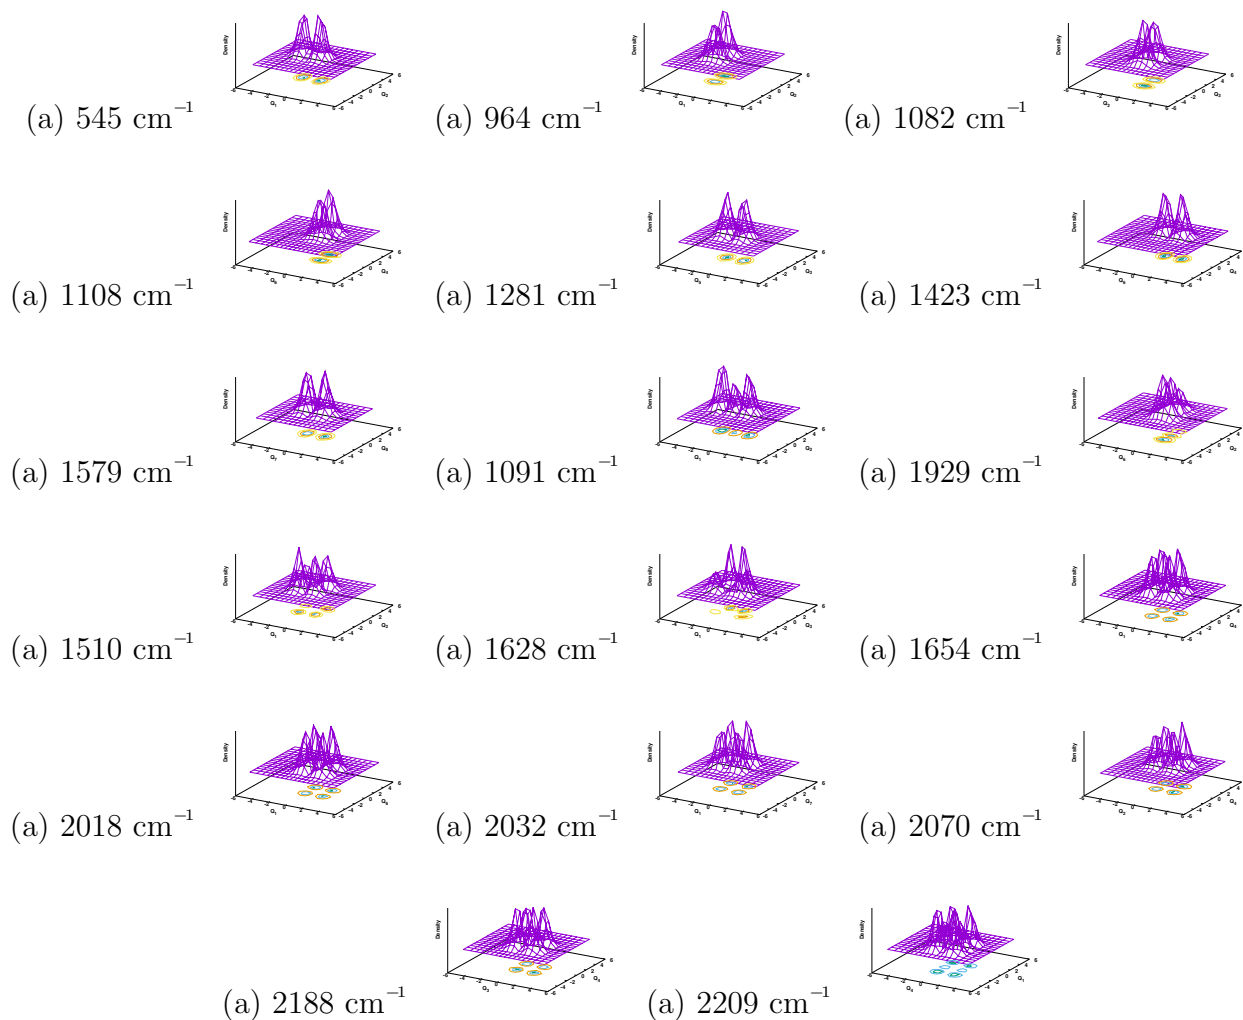

Figure S4. Wavepacket density plots for the  $\tilde{C}$  state including only totally symmetric vibrational modes. The snapshots illustrate Franck–Condon fundamentals, overtones, and combination bands in the absence of interstate vibronic coupling; the coupling parameter  $\lambda$  is therefore inactive in these calculations.

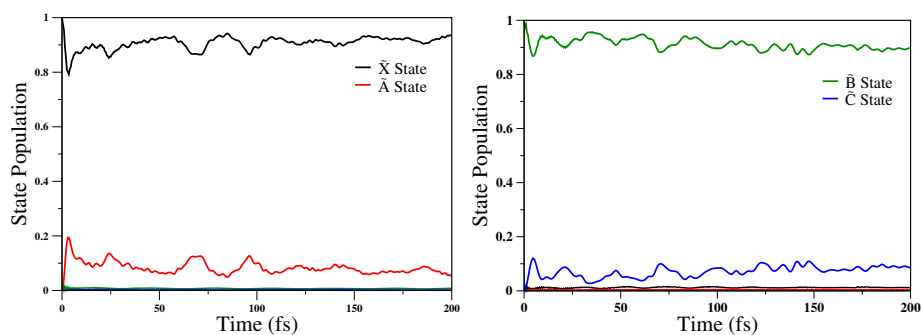

Figure S5. Electronic population plot showing initiation of WPs in  $\tilde{X}$  and  $\tilde{B}$  states respectively.
